# Supplementary material
Source: Springer Nature journal article supplement (https://www.springermedizin.de/resource/supplementary/12885_2005_440_MOESM4_ESM.pdf/9470166)

**Relative Lipophilin B mRNA expression**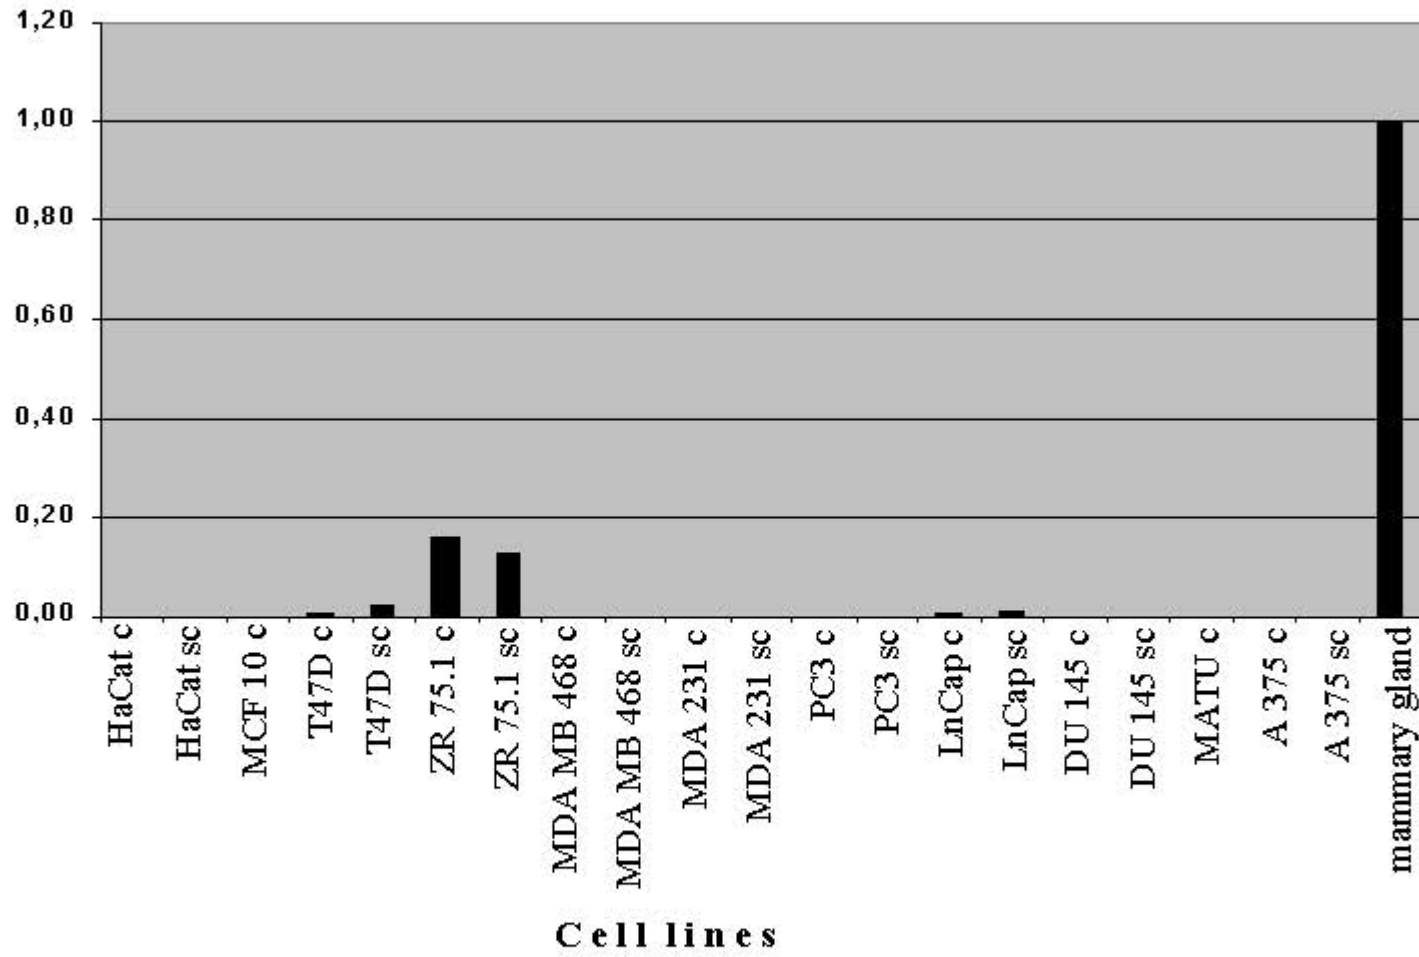

Supplement: MOESM4 [file 9470166]
